# Supplementary material
Source: bioRxiv or medRxiv preprint supplement (https://www.biorxiv.org/highwire/filestream/16919/field_highwire_adjunct_files/0/061515-1.pdf)
Supplement: Supplementary file [file 061515-1.pdf]

# Detection of statistically significant networks changes in complex biological networks Supplementary Information

June 14, 2016

## 1 Cosine similarity to calculate the edge weights

The one-step topological overlap measure used to estimate the edge weights is defined as:

$$a_{ij} = \frac{\sum_{l \neq i, j} A_{il} A_{lj} + A_{ij}}{\min(\sum_{l \neq i} A_{il} - A_{ij}, \sum_{l \neq j} A_{lj} - A_{ij}) + 1} \quad (1)$$

In this work we use the cosine similarity to calculate the edge weights  $a_{ij}$ . The cosine similarity takes into consideration one-step neighbourhood of nodes  $i$  and  $j$  while constructing the edge weight and is very efficient to calculate for sparse matrices. The weights  $a_{ij}$  are estimated as follows:

$$a_{ij} = \frac{\sum_l A_{il} A_{jl}}{\sqrt{\sum_l A_{il}^2} \sqrt{\sum_l A_{jl}^2}} \quad (2)$$

where  $A_{ij}$  represents the adjacency matrix.

We perform an experiment to calculate the correlation between the one-step topological measure and the cosine similarity measure. For this experiment, we generated 250 random geometric networks using  $N = 250$  and the connectivity parameter  $d = 0.15$ . Figure 1 shows that the cosine similarity metric is nearly perfectly correlated (pearson correlaton = 0.952) to the topological overlap measure.

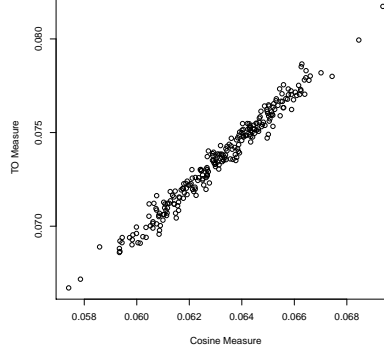

Figure 1: Correlation between topological overlap and cosine similarity.

## 2 Fast Approximation Algorithm

### Algorithm 1: Fast Approximation

**Data:** Graphs  $A$  and  $B$  with  $N$  vertices  $V$ .  
**Result:** Subset  $V^*$  representing the set of nodes which comprise the differential sub-network & p-values for GHD measure.

```

 $V^* = \{\}$  // Empty Set for differential sub-network nodes.
 $V_K = V$  // Initialize a copy of the set of vertices  $V$ .
 $p^* = \{\}$  // Empty Set for p-values.
 $\Delta_{V_K} = \{\}$  forall the  $i \in V_K$  do
   $t = \text{GHD}(A(V_{K|i}, E_A), B(V_{K|i}, E_A)) - \mu_{V_{K|i}}$ .
  // Estimate cGHD value after removal of node  $i$ .
  Add  $t$  to  $\Delta_{V_K}$ . // Perform in parallel.
Sort  $\Delta_{V_K}$  in descending order and keep in  $\mathcal{O}$ .
while  $N > 3$  do
   $z = \frac{\text{GHD}(A(V_K, E_A), B(V_K, E_B)) - \mu_{V_K}}{\sigma_{V_K}}$ .
  Calculate p-value using  $z$  and append p-value to  $p^*$ .
  if  $p\text{-value} > \theta$  then
     $\Delta_{V_K} = \{\}$  forall the  $i \in V_K$  do
       $t = (\text{GHD}(A(V_{K|i}, E_A), B(V_{K|i}, E_A)) - \mu_{V_{K|i}})$ .
      Add  $t$  to  $\Delta_{V_K}$  // Perform in parallel.
     $n^* = \max_i \Delta_{V_K}$ 
    // Select that node after removal of which cGHD becomes maximum.
    Remove node  $n^*$  from  $V_K$  and  $\mathcal{O}$ 
  else if  $p\text{-value} < \theta$  then
     $n^* = \max_i(\mathcal{O})$  // Select node in the sub-network with least contribution.
    Remove node  $n^*$  from  $\mathcal{O}$ .
  if  $p\text{-value} > 0.01$  then
    Append  $n^*$  to  $V^*$ .
   $N = N - 1$ 
Adjust the p-values for false-discovery rate.

```

### 3 Boxplots of AUC

We make box-plots for the AUC metric and observe from Figure 2a that the dGHD method has lower variance w.r.t. to the evaluation metric in comparison to Closed-Form approach in case of permuted differential sub-network. However, in case of denser differential sub-network, the Closed-Form approach has smaller variance in comparison to dGHD algorithm w.r.t. AUC metric as depicted in Figure 2b. From Figure 2 we can conclude that the performance of Closed-Form technique is significantly better than dGHD method when differential sub-networks are formed either using permuted nodes or higher density. In order to test for significance we performed the Student’s t-test under the null that the difference in the mean values of the two distributions is zero i.e.  $\mu_{AUC_A} - \mu_{AUC_B} = 0$ . At significance level of 5%, we obtain p-value of  $3.16 \times 10^{-9}$  in case of permuted sub-network, thereby rejecting the null. In the case of paired networks with a denser differential sub-network (i.e.  $d' = 0.5$ ), we obtain p-value of  $3.14 \times 10^{-14}$  for the Student’s t-test.

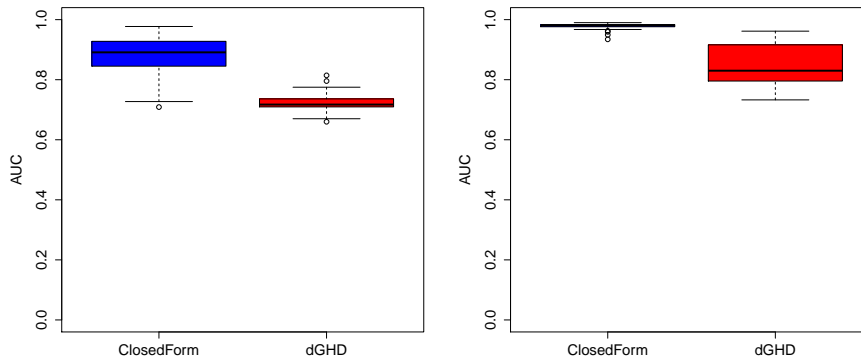

(a) Permuted sub-network ( $d = 0.3$ ) AUC (b) Dense sub-network ( $d = 0.3, d' = 0.5$ ) AUC

Figure 2: Comparison of proposed Closed-Form approach and dGHD method w.r.t. AUC metric.
